# Supplementary material for: Complete genome sequence of lovastatin producer Aspergillus terreus ATCC 20542 and evaluation of genomic diversity among A. terreus strains
Source: PubMed Central journal article supplement (PMC7880949; doi:10.1007/s00253-021-11133-0), 2021-01-30
Supplement: 253_2021_11133_MOESM1_ESM.pdf [file 253_2021_11133_MOESM1_ESM.pdf]

# Applied Microbiology and Biotechnology

## **Complete genome sequence of lovastatin producer *Aspergillus terreus* ATCC 20542 and evaluation of genomic diversity among *A. terreus* strains**

Małgorzata Ryngajłło<sup>\*1</sup>, Tomasz Boruta<sup>2</sup>, Marcin Bizukojc<sup>2</sup>

1) Institute of Molecular and Industrial Biotechnology, Lodz University of Technology, B. Stefanowskiego 4/10, 90-924 Lodz, Poland

2) Faculty of Process and Environmental Engineering, Department of Bioprocess Engineering, Lodz University of Technology, ul. Wolczanska 213, 90-924 Lodz, Poland

\*Corresponding author

Email: [malgorzata.ryngajllo@p.lodz.pl](mailto:malgorzata.ryngajllo@p.lodz.pl)

Telephone: +48 0426313354

## Supplementary Tables

**Table S1** Presence of orthologs of catabolic enzymes allowing utilization of carbohydrates based on sequence similarity with proteins of *A. niger* ATCC 1015 (employing threshold of 60% sequence identity across 60% of protein length).

| Enzyme                                    | Strain | NIH 2624 | 45A | M6925 | w25 | TN-484 | IFO 6365 | ATCC 20542 | ATCC 20542 gene IDs                                                                                                                                  |
|-------------------------------------------|--------|----------|-----|-------|-----|--------|----------|------------|------------------------------------------------------------------------------------------------------------------------------------------------------|
| Glucose oxidase                           |        | 4        | 3   | 4     | 3   | 2      | 2        | 3          | HFD88_005098;<br>HFD88_005956;<br>HFD88_007298                                                                                                       |
| Alpha-glucosidase                         |        | 4        | 4   | 4     | 4   | 4      | 4        | 4          | HFD88_001512;<br>HFD88_003103;<br>HFD88_006204;<br>HFD88_007275                                                                                      |
| Beta-glucosidase                          |        | 9        | 9   | 9     | 9   | 9      | 9        | 9          | HFD88_000633;<br>HFD88_006243;<br>HFD88_000100;<br>HFD88_002005;<br>HFD88_008328;<br>HFD88_005011;<br>HFD88_010378;<br>HFD88_010359;<br>HFD88_001431 |
| Beta-galactosidase                        |        | 2        | 2   | 2     | 2   | 2      | 2        | 2          | HFD88_000677;<br>HFD88_006315                                                                                                                        |
| Galactokinase                             |        | 1        | 1   | 1     | 1   | 1      | 1        | 1          | HFD88_009871                                                                                                                                         |
| Galactose-1-phosphate uridylyltransferase |        | 1        | 1   | 1     | 1   | 1      | 1        | 1          | HFD88_002772                                                                                                                                         |
| UDP-glucose 4-epimerase                   |        | 1        | 1   | 1     | 1   | 1      | 1        | 1          | HFD88_004936                                                                                                                                         |
| UDP-glucose pyrophosphorylase             |        | 1        | 1   | 1     | 1   | 1      | 1        | 1          | HFD88_004565                                                                                                                                         |
| Phosphoglucomutase                        |        | 2        | 2   | 2     | 2   | 2      | 2        | 2          | HFD88_004565                                                                                                                                         |
| Invertase                                 |        | 2        | 1   | 1     | 2   | 2      | 2        | 2          | HFD88_000821;<br>HFD88_004725                                                                                                                        |
| Hexokinase                                |        | 3        | 3   | 3     | 3   | 3      | 3        | 3          | HFD88_010162;<br>HFD88_003424;<br>HFD88_008047                                                                                                       |
| Mannose-6-phosphate isomerase             |        | 2        | 2   | 2     | 2   | 2      | 2        | 2          | HFD88_006399;<br>HFD88_000452                                                                                                                        |
| Oxaloacetate acetylhydrolase              |        | 2        | 2   | 2     | 2   | 2      | 2        | 2          | HFD88_009453;<br>HFD88_010407                                                                                                                        |
| Malate synthase                           |        | 3        | 3   | 3     | 3   | 2      | 3        | 3          | HFD88_003886;<br>HFD88_004697;<br>HFD88_002011                                                                                                       |
| Isocitrate lyase                          |        | 2        | 2   | 2     | 2   | 2      | 2        | 2          | HFD88_003886;<br>HFD88_004697                                                                                                                        |
| L-Arabitol dehydrogenase                  |        | 2        | 2   | 2     | 2   | 2      | 2        | 2          | HFD88_000634;<br>HFD88_003751                                                                                                                        |
| D-xylose reductase                        |        | 1        | 1   | 1     | 1   | 1      | 1        | 1          | HFD88_008228                                                                                                                                         |
| L-sylulose reductase                      |        | 4        | 4   | 4     | 4   | 4      | 4        | 4          | HFD88_003695;<br>HFD88_008283;<br>HFD88_001090;<br>HFD88_008006                                                                                      |
| D-xylulose reductase                      |        | 4        | 3   | 4     | 3   | 4      | 3        | 3          | HFD88_008288;<br>HFD88_009120;<br>HFD88_004639;<br>HFD88_005020                                                                                      |

|                    |   |   |   |   |   |   |   |                                                                 |
|--------------------|---|---|---|---|---|---|---|-----------------------------------------------------------------|
| Aldehyde reductase | 4 | 4 | 4 | 4 | 4 | 4 | 4 | HFD88_001875;<br>HFD88_003199;<br>HFD88_008111;<br>HFD88_000427 |
| D-xylulose kinase  | 1 | 1 | 1 | 1 | 1 | 1 | 1 | HFD88_003734                                                    |

**Table S2** Presence of orthologs of catabolic enzymes associated with organic acid production based on sequence similarity with proteins of *A. niger* ATCC 1015 (employing threshold of 60% sequence identity across 60% of protein length).

| Enzyme                                                    | Strain | NIH 2624 | 45A | M6925 | w25 | TN-484 | IFO 6365 | ATCC 20542 | ATCC 20542 gene IDs                            |
|-----------------------------------------------------------|--------|----------|-----|-------|-----|--------|----------|------------|------------------------------------------------|
| Pyruvate dehydrogenase E1 component subunit beta          |        | 2        | 2   | 2     | 2   | 2      | 2        | 2          | HFD88_004098;<br>HFD88_008785                  |
| Pyruvate dehydrogenase E1 component subunit alpha         |        | 1        | 1   | 1     | 1   | 1      | 1        | 1          | HFD88_010188                                   |
| Pyruvate dehydrogenase E2 component                       |        | 1        | 1   | 1     | 1   | 1      | 1        | 1          | HFD88_010188                                   |
| Citrate synthase                                          |        | 2        | 2   | 2     | 2   | 2      | 2        | 2          | HFD88_002002;<br>HFD88_006968                  |
| Aconitate hydratase                                       |        | 2        | 2   | 2     | 2   | 2      | 1        | 2          | HFD88_001544;<br>HFD88_001145                  |
| Isocitrate dehydrogenase (NAD <sup>+</sup> ) subunit      |        | 2        | 2   | 2     | 2   | 2      | 2        | 2          | HFD88_004656;<br>HFD88_006462                  |
| Isocitrate dehydrogenase [NAD] subunit 2                  |        | 2        | 2   | 2     | 2   | 2      | 2        | 2          | HFD88_006462;<br>HFD88_004656                  |
| 2-oxoglutarate dehydrogenase                              |        | 2        | 2   | 2     | 2   | 2      | 2        | 2          | HFD88_004285;<br>HFD88_009432                  |
| Dihydrolipoyllysine-residue succinyltransferase           |        | 1        | 1   | 1     | 1   | 1      | 1        | 1          | HFD88_005618                                   |
| Succinyl-CoA ligase [GDP-forming] subunit alpha           |        | 2        | 2   | 2     | 2   | 2      | 2        | 2          | HFD88_010271;<br>HFD88_006662                  |
| Succinyl-CoA ligase [GDP-forming] subunit beta            |        | 1        | 2   | 1     | 1   | 1      | 1        | 1          | HFD88_008362                                   |
| Succinate dehydrogenase [ubiquinone] flavoprotein subunit |        | 1        | 1   | 1     | 1   | 1      | 1        | 1          | HFD88_003060                                   |
| Fumarate hydratase                                        |        | 1        | 1   | 1     | 1   | 1      | 1        | 1          | HFD88_002093                                   |
| Oxaloacetate acetylhydrolase                              |        | 3        | 3   | 3     | 3   | 3      | 3        | 3          | HFD88_010407;<br>HFD88_009453;<br>HFD88_005712 |
| L-lactate dehydrogenase                                   |        | 1        | 1   | 1     | 1   | 1      | 1        | 1          | HFD88_007813                                   |
| Citramalate synthase                                      |        | 1        | 1   | 1     | 1   | 1      | 1        | 1          | HFD88_006027                                   |
| Isopropylmalate isomerase (IPMI)                          |        | 1        | 1   | 1     | 1   | 1      | 1        | 1          | HFD88_002799                                   |
| Isocitrate lyase                                          |        | 2        | 2   | 2     | 2   | 2      | 2        | 2          | HFD88_001243;<br>HFD88_002050                  |

|                      |   |   |   |   |   |   |   |                               |
|----------------------|---|---|---|---|---|---|---|-------------------------------|
| Malate synthase      | 1 | 1 | 1 | 1 | 1 | 1 | 1 | HFD88_002011                  |
| Glucose oxidase      | 3 | 2 | 2 | 3 | 1 | 1 | 2 | HFD88_005956;<br>HFD88_005098 |
| Pyruvate carboxylase | 1 | 1 | 1 | 1 | 1 | 1 | 1 | HFD88_000372                  |
| Malate dehydrogenase | 2 | 2 | 2 | 2 | 2 | 2 | 2 | HFD88_008419;<br>HFD88_003846 |

**Table S3** Unique genes of *A. terreus* ATCC 20542 with KEGG annotation.

| ATCC 20542 gene ID | KEGG ID | Description                                                            |
|--------------------|---------|------------------------------------------------------------------------|
| HFD88_000052       | K23272  | Pyranose oxidase [EC:1.1.3.10]                                         |
| HFD88_000053       | K21899  | Aldos-2-ulose dehydratase [EC:4.2.1.110]                               |
| HFD88_001689       | K16219  | Protein N-terminal methyltransferase [EC:2.1.1.244]                    |
| HFD88_003313       | K03781  | Catalase [EC:1.11.1.6]                                                 |
| HFD88_003314       | K00844  | Hexokinase [EC:2.7.1.1]                                                |
| HFD88_006108       | K05665  | ATP-binding cassette, subfamily C (CFTR/MRP), member 1 [EC:7.6.2.3]    |
| HFD88_008996       | K01426  | Amidase [EC:3.5.1.4]                                                   |
| HFD88_009056       | K17069  | O-acetylhomoserine/O-acetylserine sulfhydrylase [EC:2.5.1.49 2.5.1.47] |
| HFD88_010689       | K00069  | 15-hydroxyprostaglandin dehydrogenase (NAD) [EC:1.1.1.141]             |
| HFD88_010691       | K03380  | Phenol 2-monooxygenase (NADPH) [EC:1.14.13.7]                          |

**Table S4** Conservation of genes encoding key virulent factors in *A. terreus* reported by Thakur and Shankar, 2017. Conservation of genes in *A. terreus* genomes is based on proteinortho results.

| Gene name   | Description                           | NIH 2624 gene ID | ATCC 20542 gene ID | Conservation in <i>A. terreus</i> genomes |
|-------------|---------------------------------------|------------------|--------------------|-------------------------------------------|
| -           | Terrelysin                            | AATEG_03556      | HFD88_000914       | Conserved in all                          |
| <i>hog1</i> | Mitogen-activated protein kinase      | AATEG_00489      | HFD88_006440       | Conserved in all                          |
| <i>mpkC</i> | Mitogen-activated protein kinase      | AATEG_06557      | HFD88_003645       | Conserved in all                          |
| <i>cgrA</i> | rRNA-processing protein               | AATEG_10388      | HFD88_000168       | Conserved in all                          |
| <i>creB</i> | Ubiquitin carboxyl-terminal hydrolase | AATEG_03173      | HFD88_001301       | Conserved in all                          |
| <i>pepP</i> | Xaa-Pro aminopeptidase                | AATEG_06859      | HFD88_001743       | Conserved in all                          |
| <i>mep</i>  | Metalloproteinase                     | AATEG_07544      | HFD88_004788       | Conserved in all                          |
| <i>myoA</i> | Myosin-1 OS                           | AATEG_07759      | HFD88_005016       | Conserved in all                          |

## Supplementary Figures

### *A. terreus* ATCC 20542 genome

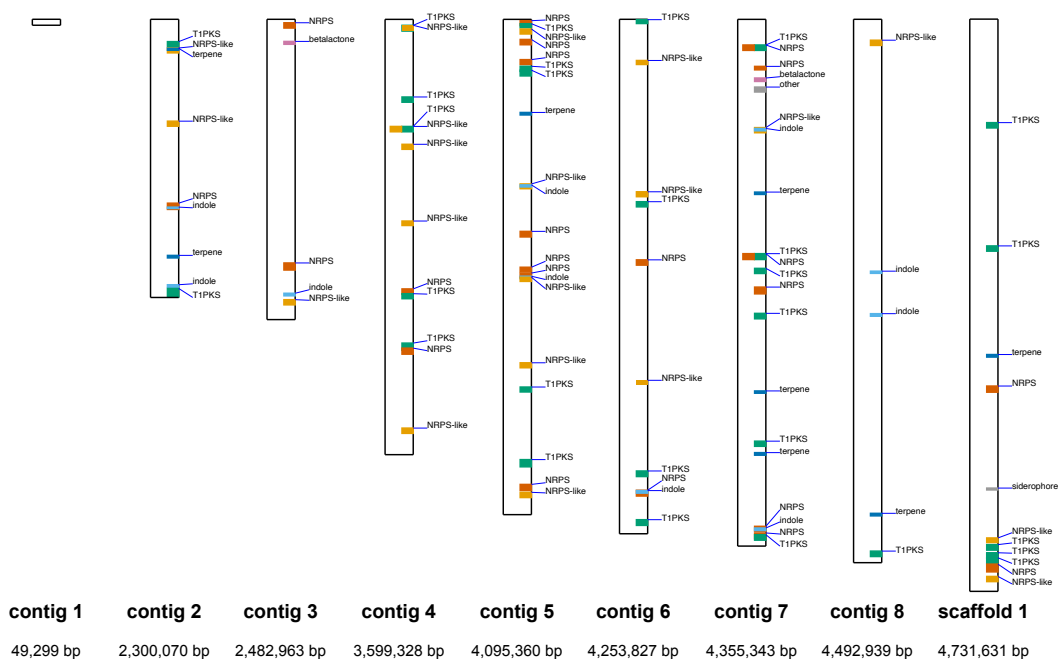

**Fig. S1** Map of *A. terreus* ATCC 20542 genome with marked SM clusters predicted by AntiSMASH

## References

Thakur R, Shankar J (2017) Proteome profile of *Aspergillus terreus* conidia at germinating stage: identification of probable virulent factors and enzymes from mycotoxin pathways. *Mycopathologia* 182:771-784
